# Supplementary material for: Serum D‐lactate concentrations in dogs with parvoviral enteritis
Source: PubMed Central journal article supplement — J Vet Intern Med. 2020 Jan 10;34(2):691–9. doi: 10.1111/jvim.15688 (PMC7096611; doi:10.1111/jvim.15688), 2020-01-10
Supplement: JVIM-34-691-s001.pdf [file JVIM-34-691-s001.pdf]

**Appendix 1: Clinical Severity Score Criteria**

| <b>Scoring categories</b> | <b>0</b> | <b>1</b>                       | <b>2</b>                    | <b>3</b>                       |
|---------------------------|----------|--------------------------------|-----------------------------|--------------------------------|
| <b>Attitude</b>           | Normal   | Mild-Moderate depression       | Severe depression           | Collapsed or moribund          |
| <b>Appetite</b>           | Normal   | Voluntarily eats small amounts | No interest                 | N/A (not applicable)           |
| <b>Vomiting episodes</b>  | Absent   | Mild (1 in 12 hours)           | Moderate (2-5 in 12 hours)  | Severe ( $\geq 6$ in 12 hours) |
| <b>Feces</b>              | Formed   | Soft/pasty                     | Watery diarrhea, non-bloody | Watery diarrhea, bloody        |
