# Supplementary material for: Serum D‐lactate concentrations in dogs with parvoviral enteritis
Source: PubMed Central journal article supplement — J Vet Intern Med. 2020 Jan 10;34(2):691–9. doi: 10.1111/jvim.15688 (PMC7096611; doi:10.1111/jvim.15688), 2020-01-10
Supplement: JVIM-34-691-s002.pdf [file JVIM-34-691-s002.pdf]

**Appendix 2: Internally modified Visual Analogue Scale (VAS) pain score criteria**

| <b>Score</b> | <b>Interpretation</b>   | <b>Description</b>                                                                                                                                                                                                                                                                                                   |
|--------------|-------------------------|----------------------------------------------------------------------------------------------------------------------------------------------------------------------------------------------------------------------------------------------------------------------------------------------------------------------|
| <b>0</b>     | No pain                 | <ul style="list-style-type: none"><li>• Displaying normal behavior</li><li>• Running, playing, eating, jumping, walking normally</li><li>• Affectionate response to caregiver</li><li>• Normal heart rate</li></ul>                                                                                                  |
| <b>1</b>     | Maybe mild discomfort   | <ul style="list-style-type: none"><li>• Appears to be normal, but condition is not as clear cut as above</li><li>• Heart rate may be normal or slightly increased due to excitement</li></ul>                                                                                                                        |
| <b>2</b>     | Mild discomfort         | <ul style="list-style-type: none"><li>• May have difficulty jumping or rising, or resist palpation of the abdomen, but otherwise shows no other signs of discomfort</li><li>• Not depressed</li><li>• Respiratory and/or heart rate may be increased</li><li>• Wags tail during interaction with caregiver</li></ul> |
| <b>3</b>     | Mild pain or discomfort | <ul style="list-style-type: none"><li>• Guards abdomen (may be slightly tucked up)</li><li>• Slightly depressed</li><li>• Cannot get comfortable or may tremble or shake</li></ul>                                                                                                                                   |
| <b>4</b>     | Mild to moderate pain   | <ul style="list-style-type: none"><li>• Painful abdomen, or pain when stretching legs</li><li>• Looks, licks, or chews at the painful area</li><li>• Sits or lies in the abnormal position and not look relaxed</li></ul>                                                                                            |

|          |                         |                                                                                                                                                                                                                                                                                                                                                                |
|----------|-------------------------|----------------------------------------------------------------------------------------------------------------------------------------------------------------------------------------------------------------------------------------------------------------------------------------------------------------------------------------------------------------|
|          |                         | <ul style="list-style-type: none"> <li>• Trembles or shakes</li> <li>• Respiratory rate may be increased or shallow</li> <li>• Whimpers</li> <li>• Slow to rise or unable to jump</li> <li>• Tail hangs down</li> <li>• Somewhat depressed in response to caregiver</li> </ul>                                                                                 |
| <b>5</b> | Moderate pain           | <ul style="list-style-type: none"> <li>• Depressed and reluctant to move</li> <li>• May bite or attempt to bite when the caregiver approaches the painful area</li> <li>• Trembles or shakes with the head down</li> <li>• May vocalize</li> <li>• Painful abdomen</li> <li>• Ears may be pulled back</li> <li>• Lies down but doesn't really sleep</li> </ul> |
| <b>6</b> | Increased moderate pain | <ul style="list-style-type: none"> <li>• Vocalizes or whines frequently without provocation and when attempting to move</li> <li>• Heart rate and respiratory rate may be increased. May take deeper breaths</li> <li>• Pupils may be dilated</li> </ul>                                                                                                       |
| <b>7</b> | Moderate to severe pain | <ul style="list-style-type: none"> <li>• Includes signs from 5 and 6</li> <li>• Very depressed and not concerned with its surroundings but usually responds to direct voice</li> </ul>                                                                                                                                                                         |

|           |                             |                                                                                                                                                                                                                                                                                       |
|-----------|-----------------------------|---------------------------------------------------------------------------------------------------------------------------------------------------------------------------------------------------------------------------------------------------------------------------------------|
|           |                             | <ul style="list-style-type: none"> <li>• Urinates and defecates without attempting to move</li> <li>• May cry out spontaneously or continually whimper.</li> </ul> <p>Occasionally, an animal at level 7 does not vocalize.</p>                                                       |
| <b>8</b>  | Severe pain                 | <ul style="list-style-type: none"> <li>• Signs as for level 7</li> <li>• Vocalizing may be more of a feature, or the patient is so consumed with pain that it does not notice another presence and just lies there</li> <li>• May thrash around in the cage intermittently</li> </ul> |
| <b>9</b>  | Severe to excruciating pain | <ul style="list-style-type: none"> <li>• As in level 8, but patient in hyperesthetic</li> <li>• When any part of the body in proximity to the abdomen is touched, the patient trembles involuntarily due to severe inflammatory pain</li> </ul>                                       |
| <b>10</b> | Almost comatose             | <ul style="list-style-type: none"> <li>• As in level 9, but patient emits piercing scream or is nearly comatose</li> <li>• Hyperesthetic/hyperalgesic</li> <li>• The whole body is trembling, and pain is elicited wherever the patient is touched</li> </ul>                         |
